# Supplementary material for: Gene Expression Analysis of Biphasic Pleural Mesothelioma: New Potential Diagnostic and Prognostic Markers
Source: MDPI journal article supplement (doi:10.3390/diagnostics12030674), 2022-03-10
Supplement: s1 [file s1]

**Supplementary Table S1. Biphasic vs Epithelioid**

| <b>Gene</b>     | <b>logFC</b> | <b>AveExpr</b> | <b>t</b>     | <b>P.Value</b> | <b>adj.P.Val</b> | <b>B</b>     |
|-----------------|--------------|----------------|--------------|----------------|------------------|--------------|
| <i>ITGA5</i>    | 1.136786283  | 10.4986036     | 6.637279408  | 4.54593E-09    | 3.66414E-07      | 10.4966588   |
| <i>COL4A2</i>   | 1.655301821  | 11.31559174    | 6.561890778  | 6.26349E-09    | 3.66414E-07      | 10.18590504  |
| <i>MMP1</i>     | 2.882160059  | 2.944917449    | 4.92499476   | 4.95272E-06    | 0.000193156      | 3.746932275  |
| <i>CFB</i>      | -1.905586447 | 11.06411397    | -4.78160045  | 8.57481E-06    | 0.000250813      | 3.221467028  |
| <i>MMP14</i>    | 0.712142287  | 11.63962539    | 4.215419627  | 6.93279E-05    | 0.001551833      | 1.2308087    |
| <i>LAMC1</i>    | 0.631688399  | 11.47084275    | 4.144776373  | 8.91332E-05    | 0.001551833      | 0.992795653  |
| <i>FN1</i>      | 1.67113331   | 14.21571314    | 4.133247097  | 9.28447E-05    | 0.001551833      | 0.954186101  |
| <i>MKI67</i>    | 1.009607564  | 8.128595879    | 4.041269638  | 0.000128277    | 0.001867652      | 0.648579102  |
| <i>BUB1</i>     | 0.855448316  | 7.671569339    | 4.008762677  | 0.000143666    | 0.001867652      | 0.541610178  |
| <i>GLI1</i>     | 3.030380287  | 3.440963586    | 3.935973376  | 0.000184815    | 0.002162334      | 0.304098     |
| <i>COL1A1</i>   | 1.451430458  | 15.31475368    | 3.799307458  | 0.000294487    | 0.003132271      | -0.13413506  |
| <i>DNMT1</i>    | 0.462037608  | 9.183729568    | 3.726467635  | 0.00037604     | 0.003666386      | -0.363471354 |
| <i>XPOT</i>     | 0.372319989  | 9.761265631    | 3.628220734  | 0.000520642    | 0.004586218      | -0.667993364 |
| <i>NOTCH1</i>   | 0.588902341  | 8.527145229    | 3.612182314  | 0.000548778    | 0.004586218      | -0.717171253 |
| <i>BIRC5</i>    | 0.904865633  | 7.781458082    | 3.583143209  | 0.000603435    | 0.004706794      | -0.805825757 |
| <i>CENPF</i>    | 0.844846893  | 8.678574111    | 3.491231295  | 0.000812518    | 0.00594154       | -1.083098475 |
| <i>BMP1</i>     | 0.687415228  | 10.44075684    | 3.462915843  | 0.000889675    | 0.006123056      | -1.167484589 |
| <i>MSLN</i>     | -1.955347881 | 11.48283101    | -3.433389673 | 0.00097748     | 0.006353622      | -1.254953009 |
| <i>MMP9</i>     | 1.889185289  | 7.548592179    | 3.292149521  | 0.001522948    | 0.009378151      | -1.665799557 |
| <i>CAV1</i>     | 0.91135976   | 9.707321651    | 3.265407254  | 0.001654197    | 0.00967705       | -1.742154832 |
| <i>NDC80</i>    | 0.925477561  | 6.780240105    | 3.125159977  | 0.002534425    | 0.014120367      | -2.134912173 |
| <i>CLDN15</i>   | -1.300086789 | 9.083351443    | -3.058224012 | 0.003093924    | 0.016454051      | -2.317724259 |
| <i>COL16A1</i>  | 1.080160514  | 10.48206844    | 3.026339179  | 0.003399058    | 0.017290859      | -2.403731172 |
| <i>CDK1</i>     | 0.80408702   | 8.358437408    | 2.970059628  | 0.004006783    | 0.018786862      | -2.553826129 |
| <i>TUBB2B</i>   | 2.263501926  | 6.845698874    | 2.969415619  | 0.004014287    | 0.018786862      | -2.555530911 |
| <i>SDC1</i>     | 0.875394183  | 7.791323355    | 2.890529562  | 0.005038278    | 0.022672249      | -2.762145875 |
| <i>PAK4</i>     | 0.392790799  | 8.515931287    | 2.862332272  | 0.00545932     | 0.023657051      | -2.834927615 |
| <i>JAG1</i>     | 0.720825537  | 8.502440223    | 2.841348078  | 0.00579343     | 0.024208259      | -2.888721361 |
| <i>PLK1</i>     | 0.685893565  | 7.492734045    | 2.81624114   | 0.006217854    | 0.025085827      | -2.952666863 |
| <i>ADCY4</i>    | 0.790524058  | 6.687293835    | 2.775577043  | 0.006966226    | 0.026699767      | -3.055265078 |
| <i>SERPINE1</i> | 1.056381209  | 11.77478613    | 2.770039262  | 0.007074297    | 0.026699767      | -3.069143953 |
| <i>IFITM1</i>   | -0.751009907 | 11.98207007    | -2.748988349 | 0.00749927     | 0.027419207      | -3.121696939 |
| <i>TOP2A</i>    | 0.625169667  | 8.766838633    | 2.702846024  | 0.008513623    | 0.030184663      | -3.235747376 |
| <i>CCNB1</i>    | 0.570825205  | 9.388889576    | 2.551211748  | 0.012789949    | 0.044012472      | -3.599315857 |
| <i>PDGFRB</i>   | 0.565959346  | 10.6634619     | 2.456132304  | 0.016378625    | 0.054651493      | -3.818320628 |
| <i>LAMA3</i>    | -1.485593322 | 7.175297638    | -2.445862699 | 0.016815844    | 0.054651493      | -3.84155479  |
| <i>PLK2</i>     | 0.541535874  | 10.92067259    | 2.425105382  | 0.017731612    | 0.055393286      | -3.888264025 |
| <i>UBE2T</i>    | 0.584873739  | 6.899694973    | 2.419400684  | 0.017990982    | 0.055393286      | -3.901041705 |
| <i>MMP7</i>     | 1.363055293  | 2.135565251    | 2.40324238   | 0.018744132    | 0.056232397      | -3.937094679 |
| <i>CDK7</i>     | -0.320860834 | 8.344222033    | -2.279495844 | 0.025506896    | 0.074607671      | -4.206314362 |
| <i>PTGS2</i>    | -1.231695213 | 5.830247234    | -2.22917915  | 0.028822267    | 0.082248908      | -4.31225573  |
| <i>CD44</i>     | 0.461153133  | 11.58540512    | 2.03306651   | 0.04561533     | 0.127071276      | -4.705273077 |
| <i>MICAL2</i>   | 0.537242007  | 11.12087627    | 2.001321647  | 0.049006716    | 0.133343855      | -4.765865174 |
| <i>KRT5</i>     | -1.494765238 | 8.958182028    | -1.849238125 | 0.068397482    | 0.181875122      | -5.044210091 |
| <i>FANCI</i>    | 0.327161852  | 8.29957897     | 1.817377809  | 0.073187635    | 0.190287851      | -5.099990075 |
| <i>EGFR</i>     | -0.458590078 | 9.713899999    | -1.711391757 | 0.091176987    | 0.231906683      | -5.279145422 |
| <i>TERT</i>     | 0.391528889  | 0.488582574    | 1.681267785  | 0.096906476    | 0.241235269      | -5.328255004 |
| <i>TNPO2</i>    | 0.320851583  | 7.369885649    | 1.65291994   | 0.102563211    | 0.249997827      | -5.373731339 |

|          |              |             |              |             |             |              |
|----------|--------------|-------------|--------------|-------------|-------------|--------------|
| EGR3     | -0.900482386 | 7.496076965 | -1.595315466 | 0.114883103 | 0.272598279 | -5.463926782 |
| TIMP3    | 0.527297002  | 13.0182603  | 1.588151862  | 0.116494991 | 0.272598279 | -5.47493492  |
| CXADR    | -0.779909756 | 8.642778116 | -1.577855035 | 0.118843584 | 0.272641162 | -5.490676777 |
| DSP      | -0.977475141 | 9.655269422 | -1.559773022 | 0.12305939  | 0.276883628 | -5.518089057 |
| CDH1     | -1.105470057 | 7.808435237 | -1.501535005 | 0.137451626 | 0.303430948 | -5.604364145 |
| PKM      | 0.157611036  | 12.63528886 | 1.486660328  | 0.141332231 | 0.304311827 | -5.625905277 |
| TACC1    | 0.287311465  | 10.54961699 | 1.480168485  | 0.143052568 | 0.304311827 | -5.635243319 |
| MCM4     | 0.242701446  | 9.404836199 | 1.460282051  | 0.1484246   | 0.310101396 | -5.663608784 |
| THBS2    | 0.532102605  | 12.89264235 | 1.449242585  | 0.151473891 | 0.310920093 | -5.679198929 |
| DNMT3A   | 0.280083198  | 9.321755553 | 1.433384538  | 0.155939075 | 0.314566755 | -5.701398399 |
| ASS1     | -0.671633101 | 10.47032272 | -1.419559942 | 0.15991424  | 0.31711807  | -5.72056282  |
| MMP3     | 1.053829715  | 3.822979683 | 1.334465714  | 0.186123048 | 0.362939944 | -5.834642639 |
| EIF4G1   | -0.13065931  | 10.47882797 | -1.303773202 | 0.196332518 | 0.376572207 | -5.874142817 |
| CCNB2    | 0.32643972   | 7.950533603 | 1.291009308  | 0.200699414 | 0.378739217 | -5.890311219 |
| AURKA    | 0.222266995  | 6.555570224 | 1.204415395  | 0.232248407 | 0.43131847  | -5.995977826 |
| PDCD1    | -0.564248776 | 4.349461681 | -1.181166382 | 0.241300432 | 0.441127352 | -6.023148053 |
| CTNNA1   | 0.113543001  | 11.75487714 | 1.146643587  | 0.255205001 | 0.450424342 | -6.062552299 |
| MAD2L1   | 0.270721931  | 7.097366387 | 1.144701394  | 0.256003804 | 0.450424342 | -6.064735629 |
| SOD1     | -0.188314386 | 7.548615996 | -1.140022855 | 0.257935307 | 0.450424342 | -6.069980376 |
| PIK3CA   | 0.162090012  | 8.726653237 | 1.10029556   | 0.274752364 | 0.472735686 | -6.113679188 |
| PTGIS    | -0.569115179 | 11.38184852 | -1.088445914 | 0.279913234 | 0.474635484 | -6.126423186 |
| LGALS3BP | -0.189188615 | 12.67530151 | -1.074201838 | 0.286205411 | 0.478371902 | -6.141565472 |
| CDH11    | 0.248155959  | 11.81941077 | 1.058989452  | 0.293032248 | 0.482884126 | -6.157523641 |
| PECAM1   | 0.217863236  | 10.03712172 | 1.032010691  | 0.305411814 | 0.496294197 | -6.185281847 |
| ADAMTS8  | 0.656030425  | 2.858601785 | 1.012162846  | 0.314742165 | 0.498633897 | -6.205258822 |
| NMU      | -0.674147574 | 8.273476115 | -1.004207427 | 0.318535084 | 0.498633897 | -6.2131601   |
| NME2     | -0.108178293 | 13.24187553 | -0.998824734 | 0.321118653 | 0.498633897 | -6.218471757 |
| SFRP1    | -0.64828999  | 7.473634028 | -0.993064332 | 0.323898942 | 0.498633897 | -6.224125361 |
| GNAQ     | 0.166668376  | 10.08021556 | 0.968225925  | 0.336070031 | 0.510651865 | -6.248138512 |
| ACSL1    | -0.195061518 | 9.86875412  | -0.956940017 | 0.341698231 | 0.512547346 | -6.258853564 |
| CHEK1    | 0.245634567  | 7.681722791 | 0.897226228  | 0.37249377  | 0.551667988 | -6.313504893 |
| GLI2     | 0.303285394  | 8.485835671 | 0.882477761  | 0.380362237 | 0.556279772 | -6.326472903 |
| SELE     | 0.478095907  | 3.029284033 | 0.854455412  | 0.395596985 | 0.559287712 | -6.350532371 |
| CD274    | 0.430914186  | 5.788318862 | 0.845453162  | 0.400569963 | 0.559287712 | -6.35810005  |
| FGF2     | -0.3871562   | 8.258258681 | -0.844352949 | 0.401180355 | 0.559287712 | -6.359019546 |
| HEG1     | -0.198108264 | 11.9054244  | -0.843705368 | 0.401539895 | 0.559287712 | -6.359560209 |
| SDHB     | -0.101325182 | 9.464685907 | -0.817183929 | 0.416433714 | 0.57320876  | -6.381353124 |
| BAP1     | 0.194177422  | 9.805883048 | 0.795912161  | 0.428616466 | 0.583117751 | -6.398338356 |
| MYH11    | 0.500471455  | 5.064063173 | 0.781669211  | 0.436890639 | 0.586322179 | -6.409465051 |
| ITGA7    | -0.369395104 | 5.998539687 | -0.774663871 | 0.440994459 | 0.586322179 | -6.414865181 |
| TGFBR2   | 0.153678968  | 10.89551059 | 0.748911451  | 0.456272917 | 0.599819452 | -6.434305431 |
| MMP12    | 0.519366671  | 1.811860433 | 0.739834312  | 0.461729781 | 0.600248716 | -6.44100342  |
| ITGB4    | -0.351869172 | 10.83303003 | -0.659239596 | 0.511778229 | 0.655967521 | -6.49693972  |
| CDKN2A   | -0.40163958  | 2.851197115 | -0.652947803 | 0.515803521 | 0.655967521 | -6.501038673 |
| MAGED1   | 0.106974735  | 12.00103811 | 0.628832838  | 0.531385364 | 0.661880218 | -6.516389028 |
| SMARCA4  | -0.090279576 | 9.82039815  | -0.628246843 | 0.531767013 | 0.661880218 | -6.516754933 |
| LGALS3   | 0.110570679  | 10.76443538 | 0.609694157  | 0.543922892 | 0.669883983 | -6.528164993 |
| EMX2     | 0.358699222  | 2.795648717 | 0.600709476  | 0.549860012 | 0.67014189  | -6.533568974 |
| MMP10    | 0.18526284   | 0.644661882 | 0.580786225  | 0.563140548 | 0.679252001 | -6.545268675 |
| CCNO     | -0.308280572 | 2.809380922 | -0.545517595 | 0.587030193 | 0.700842169 | -6.565020769 |

|               |              |             |              |             |             |              |
|---------------|--------------|-------------|--------------|-------------|-------------|--------------|
| <i>PAPPA</i>  | 0.327604378  | 7.595326187 | 0.531974106  | 0.596329674 | 0.704753251 | -6.572279718 |
| <i>PPARA</i>  | -0.079688532 | 7.485655812 | -0.499024975 | 0.619234833 | 0.72185326  | -6.589183146 |
| <i>ESR2</i>   | -0.294442923 | 2.265460731 | -0.486073475 | 0.628344352 | 0.72185326  | -6.59553368  |
| <i>CDK4</i>   | -0.056705606 | 9.545011547 | -0.484708289 | 0.62930797  | 0.72185326  | -6.596193409 |
| <i>ITGA3</i>  | 0.148930461  | 11.63712073 | 0.463695074  | 0.644220631 | 0.731784601 | -6.606115437 |
| <i>PCNA</i>   | 0.065892358  | 8.603902257 | 0.406452746  | 0.685577322 | 0.771274487 | -6.630925693 |
| <i>GALNT7</i> | -0.078039477 | 8.412532091 | -0.337702713 | 0.73653865  | 0.813882222 | -6.656426617 |
| <i>SULF1</i>  | -0.14345061  | 11.92354602 | -0.336604142 | 0.73736338  | 0.813882222 | -6.656795985 |
| <i>JUNB</i>   | -0.072649627 | 10.75642772 | -0.195066138 | 0.84587314  | 0.917388246 | -6.694337615 |
| <i>VEGFA</i>  | 0.048113662  | 11.32816869 | 0.193852502  | 0.846819919 | 0.917388246 | -6.694573212 |
| <i>TPPP</i>   | -0.096318693 | 3.334207197 | -0.153774592 | 0.878204007 | 0.923240899 | -6.701527987 |
| <i>CDKN2B</i> | -0.09423508  | 6.299283767 | -0.150649915 | 0.880659775 | 0.923240899 | -6.702002878 |
| <i>EEF2</i>   | -0.020393666 | 12.68074024 | -0.141726464 | 0.887679322 | 0.923240899 | -6.703305427 |
| <i>NF2</i>    | -0.03176001  | 8.569145405 | -0.138348143 | 0.890339225 | 0.923240899 | -6.703777821 |
| <i>VWF</i>    | -0.03371646  | 9.406849304 | -0.136649516 | 0.891677108 | 0.923240899 | -6.704011038 |
| <i>RAD21</i>  | -0.019345285 | 12.11611324 | -0.113604123 | 0.90985776  | 0.933801386 | -6.706890536 |
| <i>ITGA4</i>  | -0.011578005 | 8.360768646 | -0.048580541 | 0.961383816 | 0.978103535 | -6.71215654  |
| <i>ITGAM</i>  | -0.005282556 | 7.977981617 | -0.017445958 | 0.986127568 | 0.994628668 | -6.713183135 |
| <i>MCM2</i>   | -0.000285092 | 8.076247361 | -0.001387391 | 0.998896738 | 0.998896738 | -6.713334171 |

Supplementary Table S2. Sarcomatoid vs Biphasic

| Gene     | logFC        | AveExpr     | t            | P.Value     | adj.P.Val   | B            |
|----------|--------------|-------------|--------------|-------------|-------------|--------------|
| PAK4     | -1.052116623 | 8.515931287 | -6.620443551 | 4.88357E-09 | 5.71378E-07 | 10.42810438  |
| CLDN15   | -3.165304622 | 9.083351443 | -6.429495904 | 1.09744E-08 | 6.42E-07    | 9.643366184  |
| KRT5     | -5.883618817 | 8.958182028 | -6.285340943 | 2.01461E-08 | 7.85698E-07 | 9.055034478  |
| CXADR    | -3.301985982 | 8.642778116 | -5.768493873 | 1.72199E-07 | 5.03681E-06 | 6.980390496  |
| NMU      | -4.356972424 | 8.273476115 | -5.604252936 | 3.36345E-07 | 7.87048E-06 | 6.334419833  |
| Gli2     | -2.136133739 | 8.485835671 | -5.367167854 | 8.73318E-07 | 1.70297E-05 | 5.415189824  |
| CDH1     | -4.529495887 | 7.808435237 | -5.312547311 | 1.08563E-06 | 1.81455E-05 | 5.20580008   |
| NME2     | -0.524234162 | 13.24187553 | -4.179640686 | 7.87594E-05 | 0.001151857 | 1.111843584  |
| EGFR     | -1.212332254 | 9.713899999 | -3.906707576 | 0.000204363 | 0.002656716 | 0.211370761  |
| CFB      | -1.778814791 | 11.06411397 | -3.854249491 | 0.000244462 | 0.002860206 | 0.042800405  |
| DNMT3A   | -0.842044483 | 9.321755553 | -3.721132693 | 0.000382792 | 0.004071515 | -0.378125638 |
| PTGIS    | -2.185321419 | 11.38184852 | -3.608996582 | 0.000554536 | 0.005406729 | -0.724866374 |
| CDH11    | -0.960927497 | 11.81941077 | -3.540968066 | 0.000692094 | 0.005959892 | -0.931615596 |
| SERPINE1 | 1.5597503    | 11.77478613 | 3.531708079  | 0.000713149 | 0.005959892 | -0.959543783 |
| DSP      | -2.542615926 | 9.655269422 | -3.503490219 | 0.000781118 | 0.006092717 | -1.044329129 |
| SFRP1    | -2.595013969 | 7.473634028 | -3.432513318 | 0.000980208 | 0.007167767 | -1.255439635 |
| ITGB4    | -2.087510883 | 10.83303003 | -3.377188303 | 0.00116769  | 0.008036455 | -1.417829626 |
| CD274    | 1.907957207  | 5.788318862 | 3.232450285  | 0.001830557 | 0.011898621 | -1.833464441 |
| Gli1     | -2.8277687   | 3.440963586 | -3.171490146 | 0.002204094 | 0.013032857 | -2.004442785 |
| PIK3CA   | -0.540456543 | 8.726653237 | -3.167950218 | 0.002227839 | 0.013032857 | -2.014295835 |
| RAD21    | -0.618520057 | 12.11611324 | -3.136441568 | 0.00244998  | 0.013649889 | -2.101628542 |
| LAMC1    | -0.529056545 | 11.47084275 | -2.997538417 | 0.003698475 | 0.018911228 | -2.478611147 |
| ADAMTS8  | -2.248630824 | 2.858601785 | -2.995773902 | 0.003717592 | 0.018911228 | -2.483314781 |
| JAG1     | -0.850487398 | 8.502440223 | -2.894853711 | 0.004976424 | 0.024260066 | -2.748706681 |
| CTNNA1   | -0.327434655 | 11.75487714 | -2.855335768 | 0.005568694 | 0.026061486 | -2.850662442 |
| ADCY4    | -0.892085693 | 6.687293835 | -2.704638546 | 0.008471989 | 0.038123951 | -3.229078919 |
| EMX2     | -1.831680264 | 2.795648717 | -2.648793965 | 0.009860114 | 0.042727163 | -3.365056564 |
| TIMP3    | -1.008988464 | 13.0182603  | -2.624142351 | 0.010536243 | 0.044026442 | -3.424337325 |
| SDHB     | -0.371030094 | 9.464685907 | -2.583901922 | 0.011730763 | 0.046030778 | -3.520117452 |
| MSLN     | -1.702648097 | 11.48283101 | -2.581596848 | 0.011802764 | 0.046030778 | -3.525566712 |
| LAMA3    | -1.804992829 | 7.175297638 | -2.566091155 | 0.012297575 | 0.046297951 | -3.56211723  |
| ASS1     | -1.39992909  | 10.47032272 | -2.555007301 | 0.012662687 | 0.046297951 | -3.588131773 |
| CCNO     | -1.651875196 | 2.809380922 | -2.524086896 | 0.013733543 | 0.047479989 | -3.660205502 |
| VWF      | -0.72072127  | 9.406849304 | -2.52230689  | 0.013797604 | 0.047479989 | -3.664332189 |
| MMP3     | -2.262611174 | 3.822979683 | -2.474066511 | 0.01563947  | 0.052280515 | -3.775236474 |
| GNAQ     | -0.48752532  | 10.08021556 | -2.445598406 | 0.016827233 | 0.054688507 | -3.839834693 |
| ACSL1    | -0.569616812 | 9.86875412  | -2.413016984 | 0.018285238 | 0.056499446 | -3.912987011 |
| MYH11    | -1.788136001 | 5.064063173 | -2.411619041 | 0.018350247 | 0.056499446 | -3.916106999 |
| HEG1     | -0.650971278 | 11.9054244  | -2.393946893 | 0.019190039 | 0.057570116 | -3.955415389 |
| COL16A1  | -0.96420973  | 10.48206844 | -2.332734306 | 0.022369945 | 0.06543209  | -4.089654791 |
| LGALS3BP | -0.471687652 | 12.67530151 | -2.312649747 | 0.023510774 | 0.06709172  | -4.133048138 |
| TPPP     | -1.603876633 | 3.334207197 | -2.211105315 | 0.030102439 | 0.083856794 | -4.34744887  |
| PPARA    | -0.401802851 | 7.485655812 | -2.17272084  | 0.032987609 | 0.088933405 | -4.426302847 |
| EEF2     | -0.361093894 | 12.68074024 | -2.16690697  | 0.033445041 | 0.088933405 | -4.438140663 |
| MMP9     | 1.358089584  | 7.548592179 | 2.043609338  | 0.044534563 | 0.115789863 | -4.682577167 |
| ESR2     | -1.406869032 | 2.265460731 | -2.005482775 | 0.04855022  | 0.123486429 | -4.755581453 |
| CAV1     | 0.635109654  | 9.707321651 | 1.964991526  | 0.05315071  | 0.132311341 | -4.831763567 |
| TNPO2    | -0.398468121 | 7.369885649 | -1.772579318 | 0.08039384  | 0.195959985 | -5.174498794 |

|         |              |             |              |             |             |              |
|---------|--------------|-------------|--------------|-------------|-------------|--------------|
| PECAM1  | -0.408402828 | 10.03712172 | -1.670526811 | 0.099019117 | 0.236433402 | -5.343134487 |
| EIF4G1  | -0.191481416 | 10.47882797 | -1.649881613 | 0.103185091 | 0.240748143 | -5.376124601 |
| TGFBR2  | -0.389727657 | 10.89551059 | -1.639991983 | 0.105230493 | 0.240748143 | -5.391792888 |
| SOD1    | -0.312111568 | 7.548615996 | -1.631565029 | 0.106999175 | 0.240748143 | -5.40507476  |
| CCNB1   | 0.419248121  | 9.388889576 | 1.618001623  | 0.109896307 | 0.242601281 | -5.426318619 |
| SELE    | -1.033743998 | 3.029284033 | -1.595334819 | 0.114878772 | 0.244387371 | -5.461452041 |
| CDKN2B  | -1.155649162 | 6.299283767 | -1.595316139 | 0.114882952 | 0.244387371 | -5.461480805 |
| PTGS2   | -1.009235809 | 5.830247234 | -1.577243818 | 0.118984178 | 0.248591943 | -5.489161126 |
| PLK1    | 0.441705034  | 7.492734045 | 1.566065498  | 0.121578984 | 0.249556862 | -5.506134811 |
| AURKA   | 0.324508269  | 6.555570224 | 1.518418727  | 0.133149004 | 0.26859368  | -5.577215452 |
| BUB1    | 0.362681525  | 7.671569339 | 1.467595822  | 0.146430895 | 0.290379911 | -5.650759149 |
| NDC80   | 0.484563591  | 6.780240105 | 1.41293311   | 0.161847249 | 0.315602135 | -5.727221582 |
| LGALS3  | -0.292320143 | 10.76443538 | -1.391859059 | 0.16811412  | 0.322448394 | -5.755966304 |
| TUBB2B  | 1.212161283  | 6.845698874 | 1.373140549  | 0.173834908 | 0.324611579 | -5.781154435 |
| SMARCA4 | -0.226729726 | 9.82039815  | -1.362428541 | 0.177174834 | 0.324611579 | -5.79542307  |
| PDGFRB  | 0.36297373   | 10.6634619  | 1.360210674  | 0.177872404 | 0.324611579 | -5.798364046 |
| TACC1   | -0.3040104   | 10.54961699 | -1.352418494 | 0.180339766 | 0.324611579 | -5.808660651 |
| CDK1    | 0.415797683  | 8.358437408 | 1.326198845  | 0.188832696 | 0.33474887  | -5.842893771 |
| CENPF   | 0.357629367  | 8.678574111 | 1.276139782  | 0.205877428 | 0.359517299 | -5.906476053 |
| ITGA3   | -0.44733062  | 11.63712073 | -1.202657706 | 0.232924053 | 0.397159902 | -5.995563861 |
| EGR3    | -0.783950135 | 7.496076965 | -1.199290121 | 0.234222506 | 0.397159902 | -5.999525094 |
| TERT    | -0.31321848  | 0.488582574 | -1.161408287 | 0.249190228 | 0.416503666 | -6.043348221 |
| CDK7    | -0.185901147 | 8.344222033 | -1.140429993 | 0.257766814 | 0.420004591 | -6.067033448 |
| CDK4    | -0.153603224 | 9.545011547 | -1.133755073 | 0.260539045 | 0.420004591 | -6.074482299 |
| JUNB    | -0.485550405 | 10.75642772 | -1.125763797 | 0.263885581 | 0.420004591 | -6.083344596 |
| FGF2    | 0.592257759  | 8.258258681 | 1.11535477   | 0.268289807 | 0.420004591 | -6.094797345 |
| ITGA5   | 0.220600308  | 10.4986036  | 1.112197345  | 0.269635892 | 0.420004591 | -6.098251042 |
| PDCD1   | 0.611173683  | 4.349461681 | 1.104764118  | 0.272823495 | 0.420004591 | -6.106344372 |
| MKI67   | 0.295758664  | 8.128595879 | 1.022273663  | 0.309965495 | 0.470986531 | -6.192628466 |
| FN1     | 0.473519196  | 14.21571314 | 1.0113054    | 0.315149509 | 0.472724263 | -6.203611646 |
| UBE2T   | 0.27548401   | 6.899694973 | 0.984025917  | 0.328293535 | 0.486206881 | -6.230428306 |
| MICAL2  | -0.294478104 | 11.12087627 | -0.947249535 | 0.346579625 | 0.500832522 | -6.265449725 |
| TOP2A   | 0.250683283  | 8.766838633 | 0.935865082  | 0.352371905 | 0.500832522 | -6.276027153 |
| ITGA7   | -0.513212983 | 5.998539687 | -0.929360618 | 0.355709203 | 0.500832522 | -6.282014472 |
| MAGED1  | -0.18255834  | 12.00103811 | -0.926659398 | 0.357101099 | 0.500832522 | -6.284488943 |
| CHEK1   | 0.2922791    | 7.681722791 | 0.921880656  | 0.359572067 | 0.500832522 | -6.288849306 |
| VEGFA   | 0.262411537  | 11.32816869 | 0.912957128  | 0.364215462 | 0.501331871 | -6.296932599 |
| MMP12   | 0.717787414  | 1.811860433 | 0.882918659  | 0.380125513 | 0.5171475   | -6.323577508 |
| SULF1   | -0.412802417 | 11.92354602 | -0.836418733 | 0.405599061 | 0.541967292 | -6.36310199  |
| BMP1    | -0.191445342 | 10.44075684 | -0.832783392 | 0.407633519 | 0.541967292 | -6.366103635 |
| MAD2L1  | 0.221961006  | 7.097366387 | 0.810419571  | 0.42028501  | 0.552509508 | -6.384286742 |
| IFITM1  | -0.240074969 | 11.98207007 | -0.758819665 | 0.450358893 | 0.585466561 | -6.42438401  |
| XPOT    | -0.088623044 | 9.761265631 | -0.745741776 | 0.458174201 | 0.589081115 | -6.434134358 |
| GALNT7  | -0.194942017 | 8.412532091 | -0.728433843 | 0.468635734 | 0.595982401 | -6.446781717 |
| PKM     | 0.085557766  | 12.63528886 | 0.696865603  | 0.488059628 | 0.6140105   | -6.469095302 |
| MMP14   | -0.132698146 | 11.63962539 | -0.678271169 | 0.499704971 | 0.621973208 | -6.481782024 |
| BIRC5   | 0.192886095  | 7.781458082 | 0.659546554  | 0.511582276 | 0.630053961 | -6.494215124 |
| COL4A2  | -0.182980272 | 11.31559174 | -0.626354984 | 0.533000115 | 0.649593891 | -6.515408719 |
| NOTCH1  | -0.114789418 | 8.527145229 | -0.60798477  | 0.545049953 | 0.657431387 | -6.526673186 |
| MMP7    | 0.376420339  | 2.135565251 | 0.573088436  | 0.568313733 | 0.678497007 | -6.547156806 |

|               |              |             |              |             |             |              |
|---------------|--------------|-------------|--------------|-------------|-------------|--------------|
| <i>MCM4</i>   | 0.104949652  | 9.404836199 | 0.545267799  | 0.58720109  | 0.693964925 | -6.56262753  |
| <i>CCNB2</i>  | 0.151774301  | 7.950533603 | 0.518309396  | 0.605781192 | 0.708763995 | -6.576890271 |
| <i>DNMT1</i>  | 0.066280102  | 9.183729568 | 0.461601972  | 0.645714231 | 0.748005594 | -6.604547919 |
| <i>MMP1</i>   | 0.294032724  | 2.944917449 | 0.433858198  | 0.665647507 | 0.757796653 | -6.61691986  |
| <i>FANCI</i>  | -0.090023912 | 8.29957897  | -0.431822141 | 0.667120131 | 0.757796653 | -6.617797774 |
| <i>SDC1</i>   | -0.135113544 | 7.791323355 | -0.385245087 | 0.701155565 | 0.78880001  | -6.636758377 |
| <i>CDKN2A</i> | 0.241821583  | 2.851197115 | 0.339470066  | 0.735212496 | 0.819236781 | -6.653294315 |
| <i>PLK2</i>   | 0.078947086  | 10.92067259 | 0.305283937  | 0.761002772 | 0.839974757 | -6.664285392 |
| <i>PAPPA</i>  | -0.208623102 | 7.595326187 | -0.292528146 | 0.77069748  | 0.842725281 | -6.668088653 |
| <i>ITGA4</i>  | 0.075339331  | 8.360768646 | 0.272969941  | 0.785632932 | 0.851102343 | -6.673605608 |
| <i>CD44</i>   | 0.068758402  | 11.58540512 | 0.261756009  | 0.794233208 | 0.852525554 | -6.676597039 |
| <i>COL1A1</i> | -0.096857243 | 15.31475368 | -0.218929747 | 0.827304525 | 0.879951177 | -6.686868681 |
| <i>THBS2</i>  | -0.065048884 | 12.89264235 | -0.15298541  | 0.878824135 | 0.926328142 | -6.699109865 |
| <i>NF2</i>    | 0.035407767  | 8.569145405 | 0.133185121  | 0.894406726 | 0.934335598 | -6.701938572 |
| <i>PCNA</i>   | -0.016489152 | 8.603902257 | -0.087828971 | 0.930248694 | 0.952671689 | -6.706943456 |
| <i>BAP1</i>   | -0.024431301 | 9.805883048 | -0.086472391 | 0.931323311 | 0.952671689 | -6.70706152  |
| <i>MMP10</i>  | -0.02958323  | 0.644661882 | -0.080082577 | 0.936386703 | 0.952671689 | -6.707592915 |
| <i>MCM2</i>   | 0.015219179  | 8.076247361 | 0.063954174  | 0.949178317 | 0.957360888 | -6.708752886 |
| <i>ITGAM</i>  | -0.010108647 | 7.977981617 | -0.028827584 | 0.977079326 | 0.977079326 | -6.710380297 |

Supplementary Table S3. Sarcomatoid vs Epithelioid

| Gene     | logFC        | AveExpr     | t            | P.Value     | adj.P.Val   | B            |
|----------|--------------|-------------|--------------|-------------|-------------|--------------|
| CLDN15   | -4.465391411 | 9.083351443 | -9.516454056 | 1.69055E-14 | 1.97795E-12 | 22.61994464  |
| CFB      | -3.684401238 | 11.06411397 | -8.375875663 | 2.43498E-12 | 1.42446E-10 | 17.71470096  |
| KRT5     | -7.378384055 | 8.958182028 | -8.269890894 | 3.86857E-12 | 1.50874E-10 | 17.25811621  |
| CXADR    | -4.081895739 | 8.642778116 | -7.481752345 | 1.19993E-10 | 3.50978E-09 | 13.87379479  |
| ITGA5    | 1.357386591  | 10.4986036  | 7.18014979   | 4.4289E-10  | 1.03636E-08 | 12.58883966  |
| CDH1     | -5.634965943 | 7.808435237 | -6.934233267 | 1.277E-09   | 2.49015E-08 | 11.54785237  |
| NMU      | -5.031119997 | 8.273476115 | -6.789719034 | 2.37214E-09 | 3.96487E-08 | 10.93954672  |
| SERPINE1 | 2.616131509  | 11.77478613 | 6.215033916  | 2.70578E-08 | 3.9572E-07  | 8.552596647  |
| MSLN     | -3.657995978 | 11.48283101 | -5.819168849 | 1.3988E-07  | 1.81843E-06 | 6.946293352  |
| EGFR     | -1.670922333 | 9.713899999 | -5.649366093 | 2.80033E-07 | 3.27638E-06 | 6.268999979  |
| NME2     | -0.632412455 | 13.24187553 | -5.29015326  | 1.18665E-06 | 1.16794E-05 | 4.863279277  |
| COL4A2   | 1.472321549  | 11.31559174 | 5.287777186  | 1.19789E-06 | 1.16794E-05 | 4.854113905  |
| BUB1     | 1.218129841  | 7.671569339 | 5.171646441  | 1.89545E-06 | 1.7059E-05  | 4.408443604  |
| MMP9     | 3.247274873  | 7.548592179 | 5.126756874  | 2.26082E-06 | 1.8894E-05  | 4.237403196  |
| DSP      | -3.520091067 | 9.655269422 | -5.088950846 | 2.62134E-06 | 2.04465E-05 | 4.0939004    |
| CAV1     | 1.546469414  | 9.707321651 | 5.020043876  | 3.42868E-06 | 2.50723E-05 | 3.833661435  |
| MMP1     | 3.176192783  | 2.944917449 | 4.917147158  | 5.10471E-06 | 3.43404E-05 | 3.448310858  |
| LAMA3    | -3.29058615  | 7.175297638 | -4.908220611 | 5.28314E-06 | 3.43404E-05 | 3.415069201  |
| GLI2     | -1.832848346 | 8.485835671 | -4.831672402 | 7.08508E-06 | 4.36292E-05 | 3.131277524  |
| FN1      | 2.144652506  | 14.21571314 | 4.80569143   | 7.82344E-06 | 4.57671E-05 | 3.035480236  |
| PTGIS    | -2.754436598 | 11.38184852 | -4.772634088 | 8.87205E-06 | 4.943E-05   | 2.913981315  |
| MKI67    | 1.305366228  | 8.128595879 | 4.733869472  | 1.02769E-05 | 5.46542E-05 | 2.772069965  |
| CENPF    | 1.20247626   | 8.678574111 | 4.501899498  | 2.44722E-05 | 0.000119675 | 1.936091539  |
| SFRP1    | -3.243303959 | 7.473634028 | -4.501055766 | 2.45486E-05 | 0.000119675 | 1.933093677  |
| PAK4     | -0.659325824 | 8.515931287 | -4.352888084 | 4.22468E-05 | 0.000197715 | 1.411677201  |
| NDC80    | 1.410041152  | 6.780240105 | 4.313768371  | 4.86824E-05 | 0.000219071 | 1.275720444  |
| PLK1     | 1.127598599  | 7.492734045 | 4.194559037  | 7.46854E-05 | 0.000323637 | 0.865982502  |
| CD274    | 2.338871394  | 5.788318862 | 4.157418812  | 8.52278E-05 | 0.00035613  | 0.739761877  |
| ITGB4    | -2.439380055 | 10.83303003 | -4.140570725 | 9.04702E-05 | 0.000365001 | 0.68273304   |
| TUBB2B   | 3.475663209  | 6.845698874 | 4.130917112  | 9.36126E-05 | 0.000365089 | 0.650121586  |
| CDK1     | 1.219884703  | 8.358437408 | 4.082249798  | 0.000111124 | 0.000419404 | 0.48644176   |
| CCNB1    | 0.990073326  | 9.388889576 | 4.008938545  | 0.000143578 | 0.000524956 | 0.242199369  |
| ASS1     | -2.071562191 | 10.47032272 | -3.966781633 | 0.000166179 | 0.000589179 | 0.10303604   |
| BIRC5    | 1.097751728  | 7.781458082 | 3.938246315  | 0.000183374 | 0.000631023 | 0.009379733  |
| DNMT1    | 0.52831771   | 9.183729568 | 3.860413889  | 0.000239386 | 0.000800233 | -0.243820266 |
| PTGS2    | -2.240931023 | 5.830247234 | -3.674420721 | 0.000447059 | 0.001452943 | -0.835108164 |
| PDGFRB   | 0.928933076  | 10.6634619  | 3.65232673   | 0.00048092  | 0.001520746 | -0.904018857 |
| SDHB     | -0.472355276 | 9.464685907 | -3.451356885 | 0.000923122 | 0.002842243 | -1.517367978 |
| TOP2A    | 0.87585295   | 8.766838633 | 3.430625237  | 0.000986108 | 0.002958323 | -1.579226663 |
| LGALS3BP | -0.660876267 | 12.67530151 | -3.39961489  | 0.001087944 | 0.00308838  | -1.671249828 |
| ACSL1    | -0.76467833  | 9.86875412  | -3.398682328 | 0.001091155 | 0.00308838  | -1.674007786 |
| RAD21    | -0.637865342 | 12.11611324 | -3.393646721 | 0.001108649 | 0.00308838  | -1.688890552 |
| IFITM1   | -0.991084876 | 11.98207007 | -3.286674957 | 0.001548993 | 0.004214701 | -2.001206834 |
| HEG1     | -0.849079542 | 11.9054244  | -3.276085834 | 0.001600562 | 0.00425604  | -2.031719744 |
| CDK7     | -0.506761981 | 8.344222033 | -3.261705878 | 0.001673178 | 0.004350262 | -2.073038415 |
| UBE2T    | 0.860357749  | 6.899694973 | 3.224359265  | 0.001876472 | 0.004772766 | -2.179711953 |
| COL1A1   | 1.354573214  | 15.31475368 | 3.212398136  | 0.00194633  | 0.00484512  | -2.2136813   |
| CCNO     | -1.960155768 | 2.809380922 | -3.142475247 | 0.002405902 | 0.005864386 | -2.410344944 |

|         |              |             |              |             |             |              |
|---------|--------------|-------------|--------------|-------------|-------------|--------------|
| MMP14   | 0.579444141  | 11.63962539 | 3.107450992  | 0.002672475 | 0.006381215 | -2.507611376 |
| EIF4G1  | -0.322140726 | 10.47882797 | -2.912232178 | 0.004734838 | 0.011079521 | -3.034189999 |
| MMP7    | 1.739475632  | 2.135565251 | 2.778568599  | 0.006908477 | 0.015848859 | -3.379061749 |
| VWF     | -0.75443773  | 9.406849304 | -2.770181326 | 0.007071506 | 0.015910888 | -3.400266406 |
| CDH11   | -0.712771538 | 11.81941077 | -2.755725462 | 0.007360786 | 0.016249282 | -3.436691459 |
| SOD1    | -0.500425954 | 7.548615996 | -2.744660036 | 0.007589494 | 0.016443903 | -3.464468732 |
| PPARA   | -0.481491383 | 7.485655812 | -2.731704047 | 0.007865526 | 0.01673212  | -3.496876078 |
| EGR3    | -1.684432522 | 7.496076965 | -2.703607515 | 0.008495914 | 0.017750391 | -3.566724421 |
| AURKA   | 0.546775263  | 6.555570224 | 2.684286412  | 0.008955798 | 0.018382954 | -3.614413376 |
| NOTCH1  | 0.474112922  | 8.527145229 | 2.63467377   | 0.010242405 | 0.020661403 | -3.73557746  |
| DNMT3A  | -0.561961285 | 9.321755553 | -2.605557906 | 0.011073486 | 0.021959286 | -3.805812711 |
| ESR2    | -1.701311955 | 2.265460731 | -2.544505712 | 0.013017622 | 0.025384363 | -3.950973405 |
| PLK2    | 0.620482961  | 10.92067259 | 2.517398198  | 0.013975661 | 0.026805777 | -4.01450066  |
| XPOT    | 0.283696945  | 9.761265631 | 2.504670964  | 0.014447005 | 0.027262896 | -4.044129751 |
| TPPP    | -1.700195325 | 3.334207197 | -2.459186673 | 0.016250569 | 0.030179627 | -4.148979903 |
| EEF2    | -0.38148756  | 12.68074024 | -2.40189884  | 0.018808005 | 0.034383384 | -4.278714677 |
| PIK3CA  | -0.378366531 | 8.726653237 | -2.326936291 | 0.02269413  | 0.040849434 | -4.444516061 |
| BMP1    | 0.495969887  | 10.44075684 | 2.26358481   | 0.026516926 | 0.047007278 | -4.581093028 |
| EMX2    | -1.472981043 | 2.795648717 | -2.234857724 | 0.028430048 | 0.049646501 | -4.641944009 |
| ADAMTS8 | -1.592600399 | 2.858601785 | -2.226137083 | 0.029034332 | 0.049956129 | -4.660282232 |
| SDC1    | 0.740280639  | 7.791323355 | 2.214566998  | 0.029853455 | 0.050621077 | -4.684515639 |
| CD44    | 0.529911535  | 11.58540512 | 2.116549696  | 0.037644134 | 0.062919482 | -4.885353123 |
| PKM     | 0.243168801  | 12.63528886 | 2.078029256  | 0.041158205 | 0.067824085 | -4.962079682 |
| SMARCA4 | -0.317009302 | 9.82039815  | -1.998625782 | 0.049304423 | 0.080119688 | -5.116271012 |
| CTNNA1  | -0.213891655 | 11.75487714 | -1.956953893 | 0.054106836 | 0.086719176 | -5.195035873 |
| MCM4    | 0.347651098  | 9.404836199 | 1.895076137  | 0.061969228 | 0.097978374 | -5.309226851 |
| MAD2L1  | 0.492682936  | 7.097366387 | 1.887360963  | 0.063014081 | 0.098301966 | -5.323231585 |
| MYH11   | -1.287664546 | 5.064063173 | -1.822070202 | 0.072465025 | 0.111557998 | -5.439665401 |
| CDKN2B  | -1.249884241 | 6.299283767 | -1.810275831 | 0.074292745 | 0.112886379 | -5.46029942  |
| CHEK1   | 0.537913666  | 7.681722791 | 1.780097253  | 0.079144981 | 0.118717471 | -5.512537388 |
| CCNB2   | 0.478214021  | 7.950533603 | 1.713433904  | 0.090798849 | 0.134474245 | -5.625066017 |
| GNAQ    | -0.320856944 | 10.08021556 | -1.688704341 | 0.095465437 | 0.139618201 | -5.665801796 |
| ITGA7   | -0.882608087 | 5.998539687 | -1.676906096 | 0.097759899 | 0.141208743 | -5.685043326 |
| CDK4    | -0.210308831 | 9.545011547 | -1.628660751 | 0.107614275 | 0.153547198 | -5.762422592 |
| MMP12   | 1.237154085  | 1.811860433 | 1.59662476   | 0.114590441 | 0.161531104 | -5.812642475 |
| MMP3    | -1.208781459 | 3.822979683 | -1.386766824 | 0.169655949 | 0.236306501 | -6.11840566  |
| JUNB    | -0.558200032 | 10.75642772 | -1.357866348 | 0.178612014 | 0.245854184 | -6.157324081 |
| TIMP3   | -0.481691462 | 13.0182603  | -1.31439031  | 0.192754526 | 0.262235809 | -6.214400304 |
| FANCI   | 0.23713794   | 8.29957897  | 1.193444644  | 0.236488778 | 0.318036633 | -6.363825321 |
| SULF1   | -0.556253027 | 11.92354602 | -1.182518972 | 0.240766952 | 0.320110607 | -6.376641859 |
| THBS2   | 0.467053721  | 12.89264235 | 1.152474202  | 0.25281756  | 0.332355669 | -6.41130076  |
| VEGFA   | 0.310525199  | 11.32816869 | 1.133492154  | 0.26064867  | 0.33884327  | -6.432754411 |
| GALNT7  | -0.272981494 | 8.412532091 | -1.070217572 | 0.287982739 | 0.370263521 | -6.501778523 |
| TGFBR2  | -0.236048689 | 10.89551059 | -1.042164562 | 0.300711641 | 0.382426761 | -6.531151255 |
| LGALS3  | -0.181749463 | 10.76443538 | -0.907954041 | 0.366835497 | 0.461502721 | -6.661159646 |
| SELE    | -0.555648091 | 3.029284033 | -0.899689973 | 0.371189436 | 0.462012383 | -6.668593845 |
| ITGA3   | -0.298400159 | 11.63712073 | -0.841718111 | 0.402644462 | 0.495888443 | -6.718872367 |
| MICAL2  | 0.242763904  | 11.12087627 | 0.819312755  | 0.415226073 | 0.501929897 | -6.737424617 |
| PECAM1  | -0.190539592 | 10.03712172 | -0.817719116 | 0.416129915 | 0.501929897 | -6.738725476 |
| BAP1    | 0.169746121  | 9.805883048 | 0.630354623  | 0.530394913 | 0.63322658  | -6.87426333  |



|                |              |             |              |             |             |              |
|----------------|--------------|-------------|--------------|-------------|-------------|--------------|
| <i>LAMC1</i>   | 0.102631853  | 11.47084275 | 0.610097223  | 0.543657309 | 0.642504092 | -6.886841347 |
| <i>JAG1</i>    | -0.129661861 | 8.502440223 | -0.463047133 | 0.644682834 | 0.754278916 | -6.965928815 |
| <i>MMP10</i>   | 0.15567961   | 0.644661882 | 0.442158929  | 0.659657468 | 0.764157661 | -6.975416288 |
| <i>FGF2</i>    | 0.20510156   | 8.258258681 | 0.405252258  | 0.686455594 | 0.782022797 | -6.991114429 |
| <i>MAGED1</i>  | -0.075583605 | 12.00103811 | -0.402531868 | 0.688447419 | 0.782022797 | -6.992217679 |
| <i>TNPO2</i>   | -0.077616538 | 7.369885649 | -0.362260159 | 0.718185084 | 0.80795822  | -7.007684022 |
| <i>ADCY4</i>   | -0.101561635 | 6.687293835 | -0.323062503 | 0.747554566 | 0.832989374 | -7.02117889  |
| <i>TERT</i>    | 0.078310409  | 0.488582574 | 0.304657059  | 0.761478335 | 0.840499671 | -7.026984371 |
| <i>COL16A1</i> | 0.115950784  | 10.48206844 | 0.294321281  | 0.769332404 | 0.841232629 | -7.030095605 |
| <i>PCNA</i>    | 0.049403206  | 8.603902257 | 0.27608882   | 0.783245664 | 0.848516136 | -7.035322691 |
| <i>ITGA4</i>   | 0.063761326  | 8.360768646 | 0.242384372  | 0.809149574 | 0.858583705 | -7.044107301 |
| <i>GLI1</i>    | 0.202611587  | 3.440963586 | 0.238417413  | 0.812213119 | 0.858583705 | -7.045066238 |
| <i>CDKN2A</i>  | -0.159817996 | 2.851197115 | -0.235389082 | 0.814553772 | 0.858583705 | -7.045787644 |
| <i>PAPPA</i>   | 0.118981276  | 7.595326187 | 0.175040318  | 0.861523665 | 0.899984543 | -7.0582431   |
| <i>PDCD1</i>   | 0.046924906  | 4.349461681 | 0.088994372  | 0.929325623 | 0.962222105 | -7.069671456 |
| <i>TACC1</i>   | -0.016698935 | 10.54961699 | -0.077940942 | 0.938084367 | 0.962770797 | -7.070599802 |
| <i>MCM2</i>    | 0.014934087  | 8.076247361 | 0.065843142  | 0.947679399 | 0.96416078  | -7.071474971 |
| <i>ITGAM</i>   | -0.015391203 | 7.977981617 | -0.046051309 | 0.963392798 | 0.971697909 | -7.072589218 |
| <i>NF2</i>     | 0.003647757  | 8.569145405 | 0.014395849  | 0.988552723 | 0.988552723 | -7.07355199  |

# SUPPLEMENTARY FIGURES

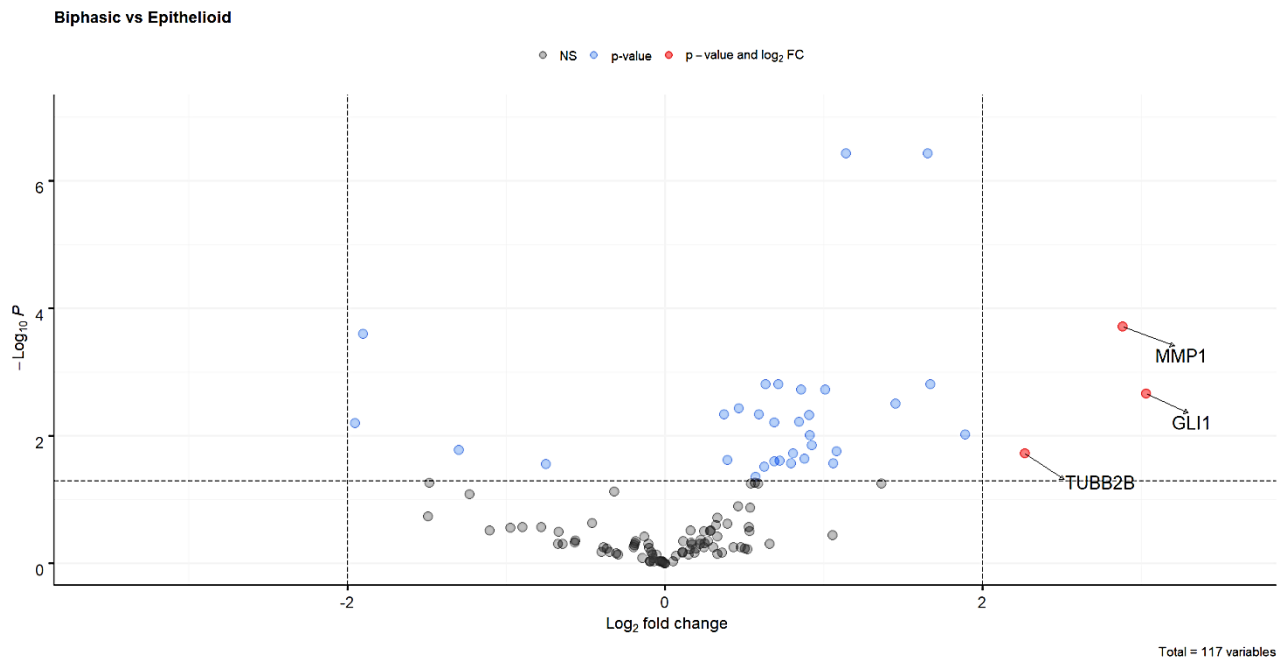

**Figure S1:** Volcano plot. Biphasic versus epithelioid mesothelioma.

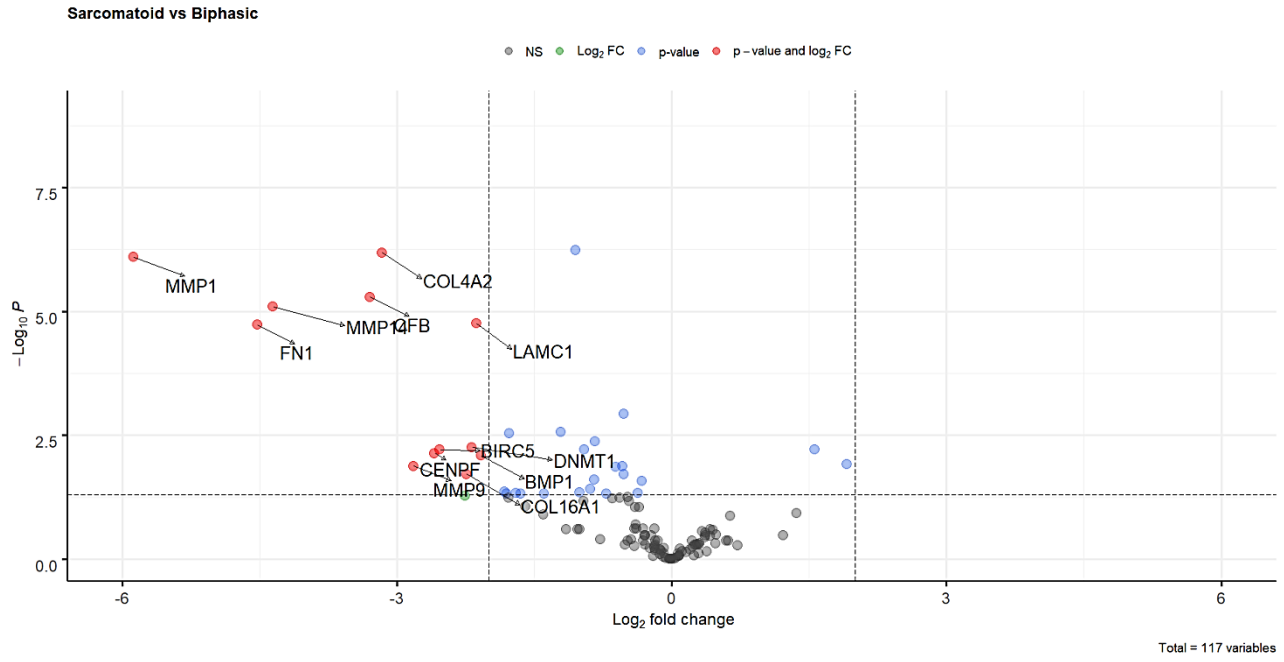

**Figure S2:** Volcano plot. Sarcomatoid versus biphasic mesothelioma.

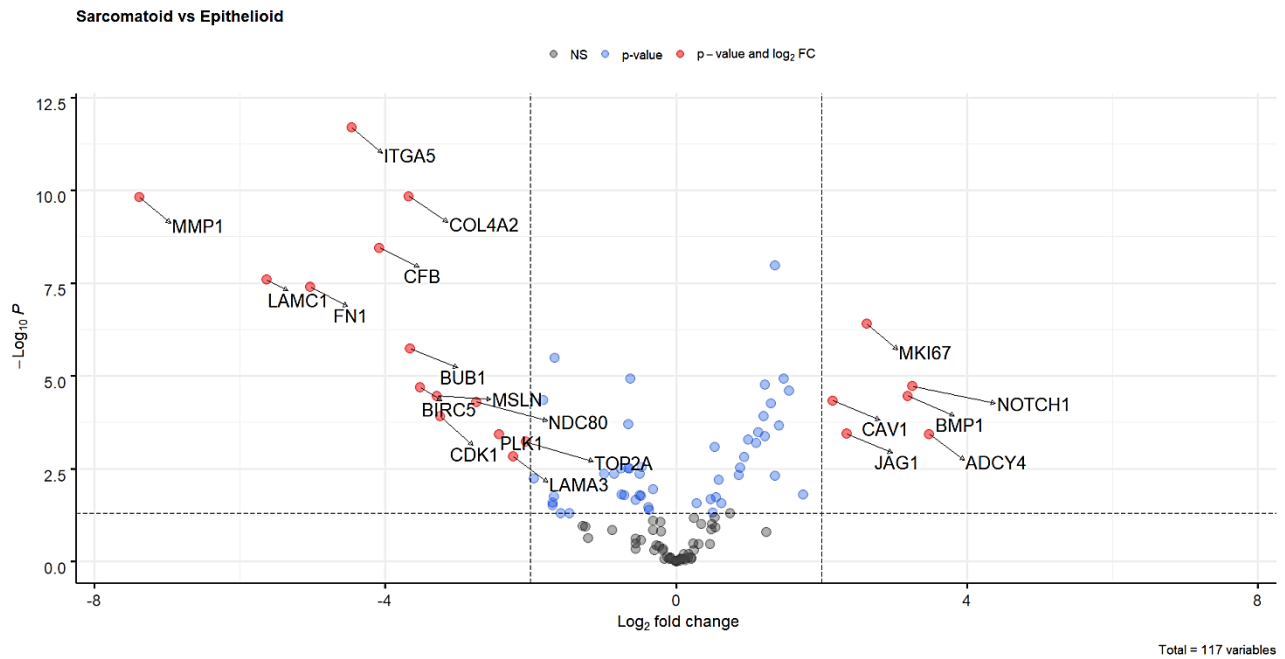

**Figure S3:** Volcano plot. Sarcomatoid versus epithelioid mesothelioma.

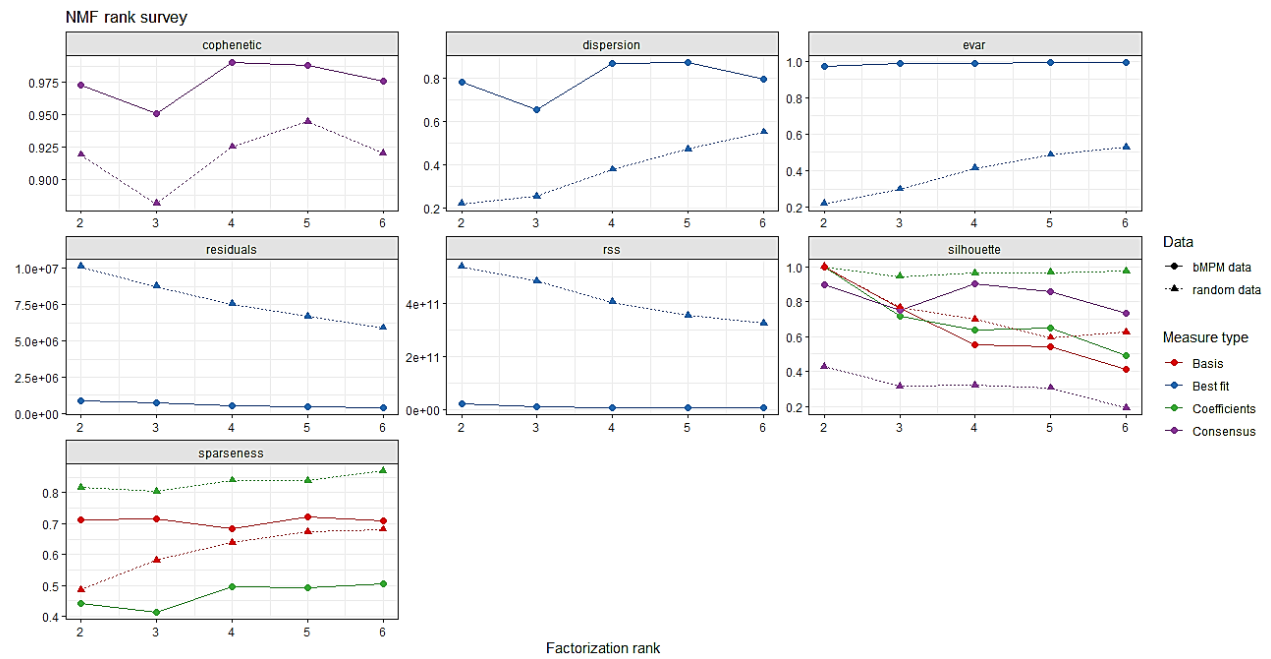

**Figure S4:** Non-negative matrix factorization algorithm performance using the 117 genes compared to a random matrix.

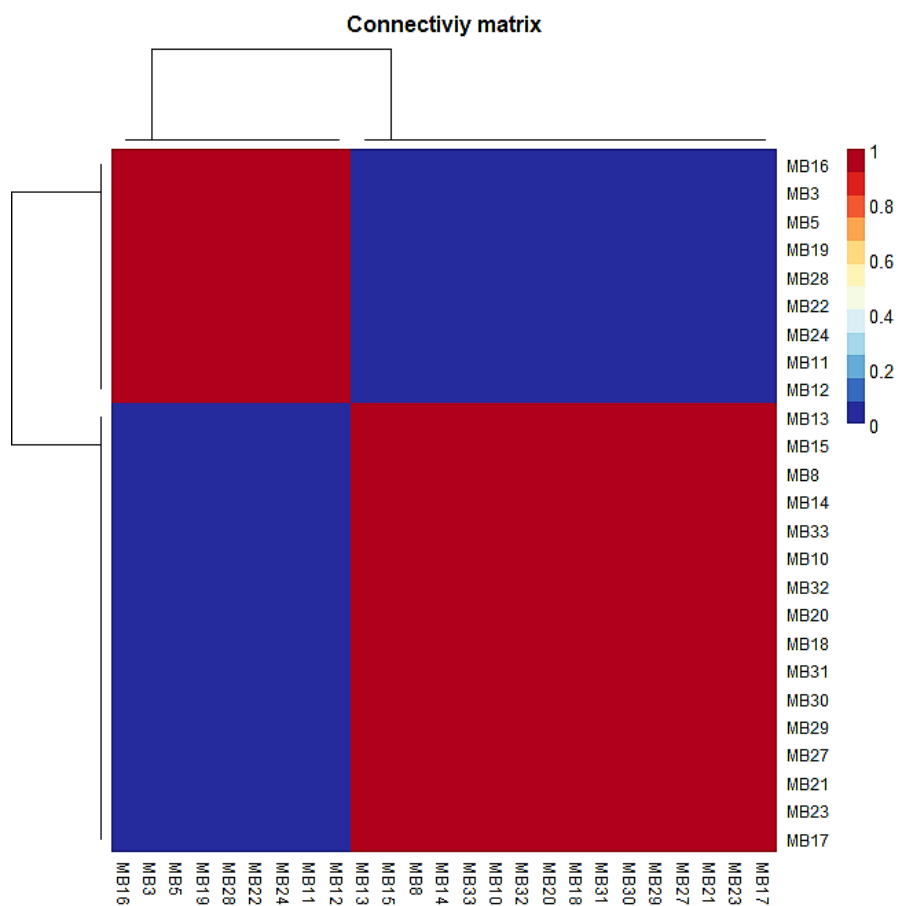

**Figure S5:** Consensus plot. Best fitting clustering by the non-negative matrix factorization algorithm.
